# Supplementary material for: Low-temperature FTIR spectroscopy of the L/Q switch of proteorhodopsin
Source: Royal Society of Chemistry journal article supplement (doi:10.1039/d4cp02248c), 2024-01-01
Supplement: d4cp02248c1.pdf [file d4cp02248c1.pdf]

Supplementary Information

**Low-Temperature FTIR Spectroscopy of the L/Q Switch of  
Proteorhodopsin**

Tatsuro Nishikino,<sup>a,b</sup> Teppei Sugimoto,<sup>a</sup> and Hideki Kandori<sup>\*,a,b</sup>

<sup>a</sup>Department of Life Science and Applied Chemistry, Nagoya Institute of Technology, Showa-ku, Nagoya 466-8555, Japan

<sup>b</sup>OptoBioTechnology Research Center, Nagoya Institute of Technology, Showa-ku, Nagoya 466-8555, Japan



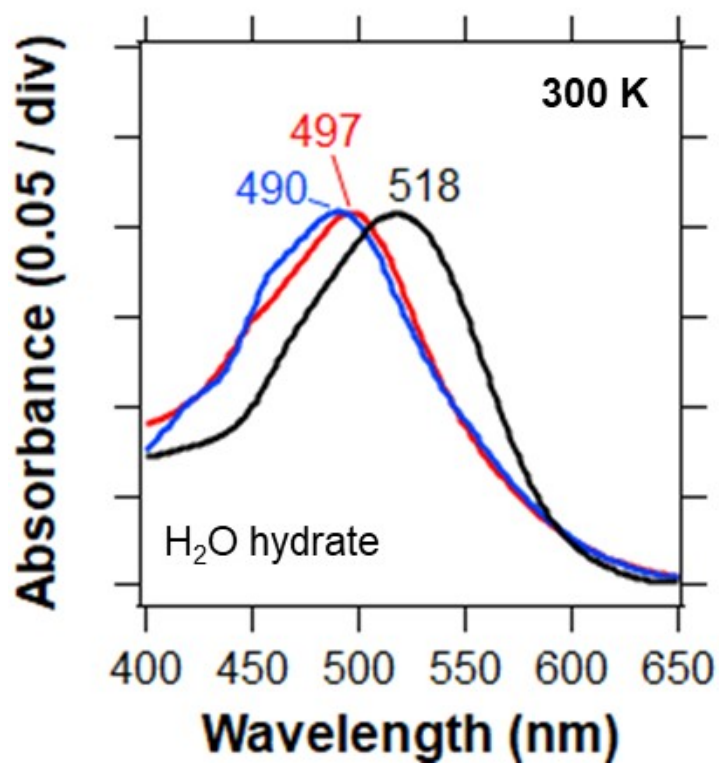

**Fig. S2** UV-visible absorption spectra of hydrated films of GPR (black line), L105Q GPR (red line), and BPR (blue line) at pH 10 and 300 K.

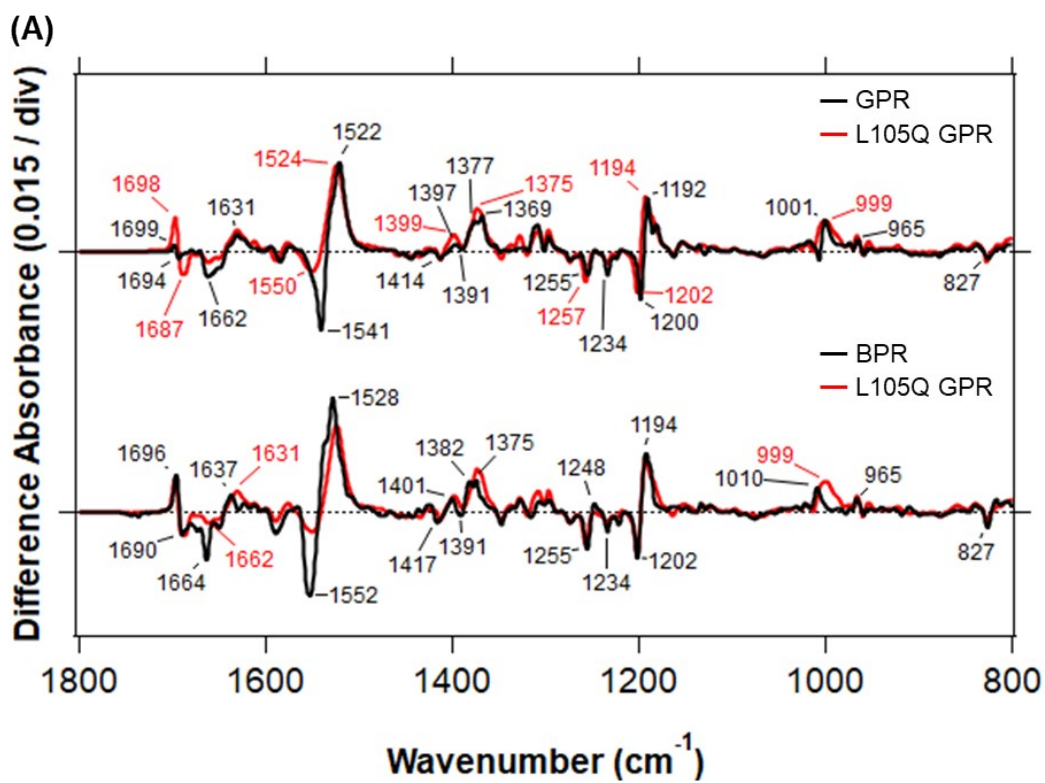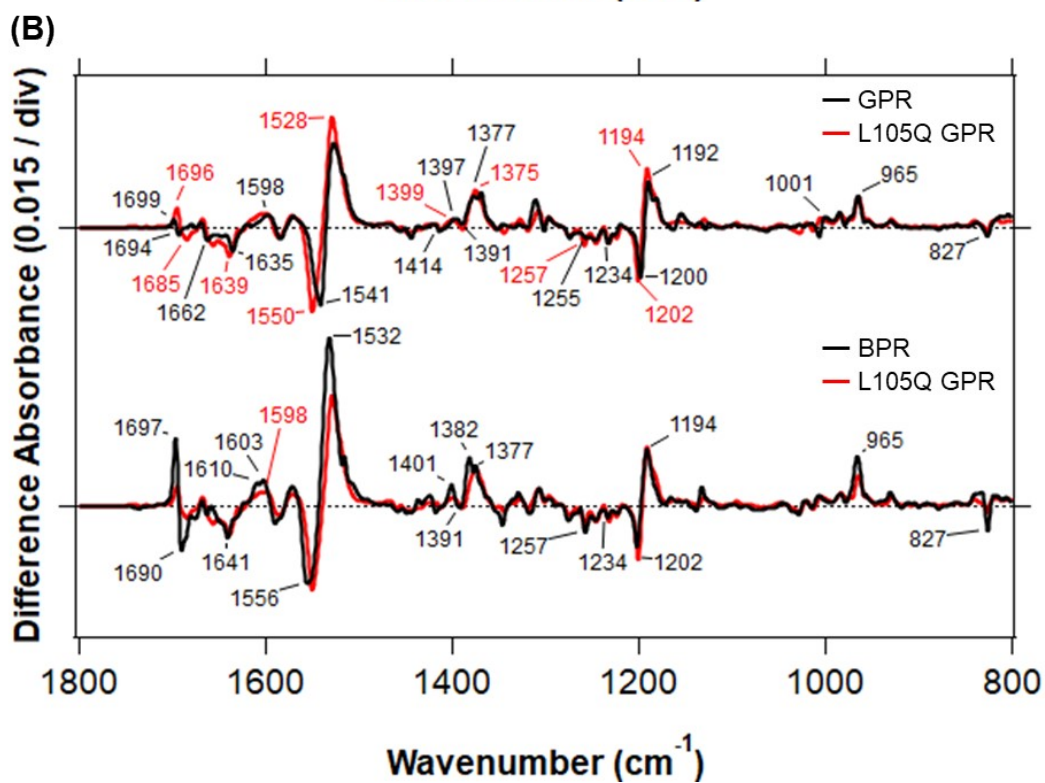

**Fig. S3** Light-induced difference FTIR spectra of GPR (black line in the top panel), L105Q GPR (red lines), and BPR (black line in the bottom panel) in H<sub>2</sub>O (A) and D<sub>2</sub>O (B). Data of (A) and (B) for each spectrum are from Fig. 3.

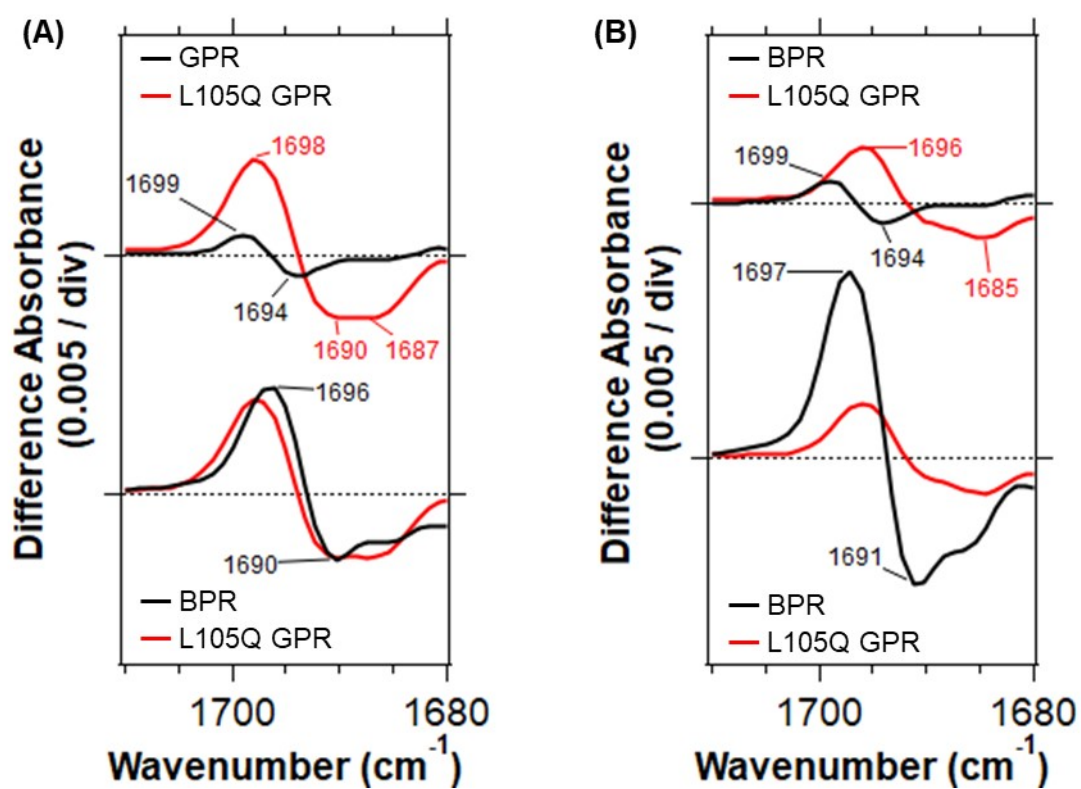

**Fig. S4** Light-induced difference FTIR spectra of GPR (black line in the top panel), L105Q GPR (red lines), and BPR (black line in the bottom panel) in H<sub>2</sub>O (A) and D<sub>2</sub>O (B). Data of (A) and (B) for each spectrum are from Fig. 4.
